# Supplementary material for: Few-nm-sized, phase-pure Au5Sn intermetallic nanoparticles: synthesis and characterization
Source: Royal Society of Chemistry journal article supplement (doi:10.1039/d1dt00132a), 2021-01-01
Supplement: d1dt00132a1.pdf [file d1dt00132a1.pdf]

## Supporting Information

### Few-nm-sized, phase-pure Au<sub>5</sub>Sn intermetallic nanoparticles: synthesis and characterization

Satoshi Osugi,<sup>a</sup> Shinjiro Takano,<sup>a</sup> Shinya Masuda,<sup>a</sup> Koji Harano,<sup>a</sup>  
and Tatsuya Tsukuda<sup>\*a,b</sup>

<sup>a</sup>Department of Chemistry, Graduate School of Science, The University of Tokyo, 7-3-1  
Hongo, Bunkyo-ku, Tokyo 113-0033, Japan

<sup>b</sup>Elements Strategy Initiative for Catalysts and Batteries (ESICB), Kyoto University, Katsura,  
Kyoto 615-8520, Japan

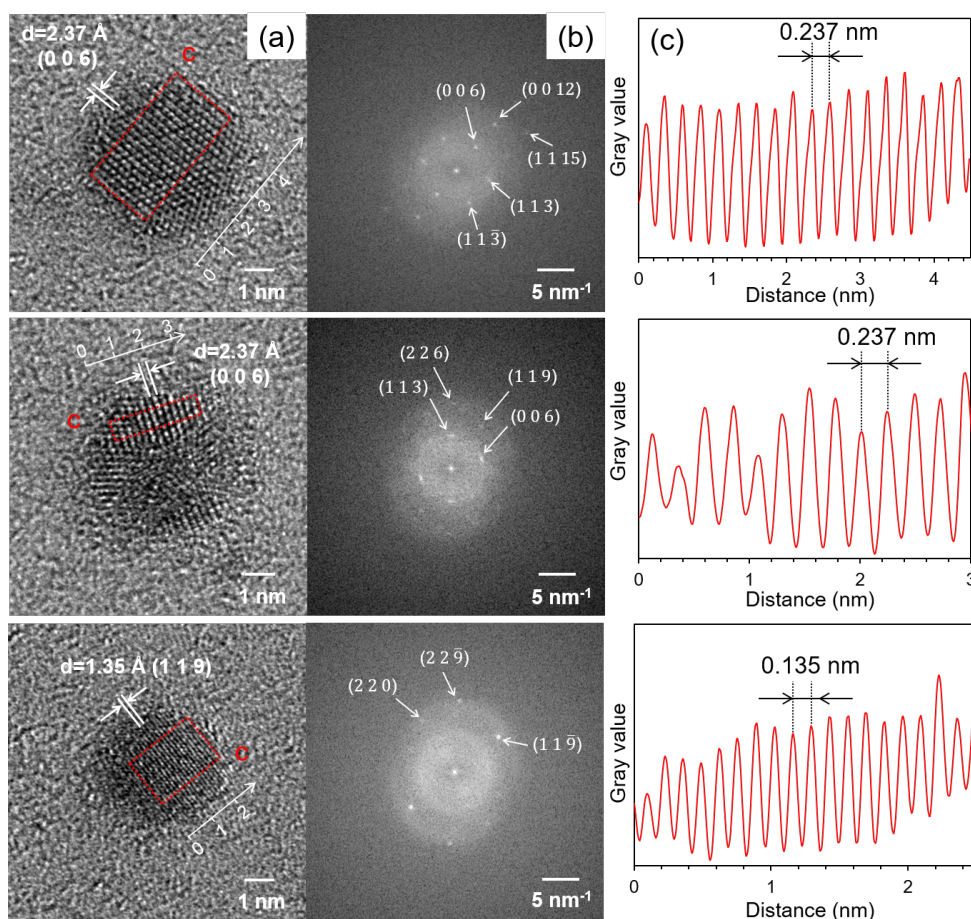

**Fig. S1.** (a) HRTEM images and (b) the corresponding fast FFT patterns of three NPs of AuSn(6:4)-OAm. (c) The intensity profiles along the white arrows in panel (a) calculated from the selected areas shown by red squares.

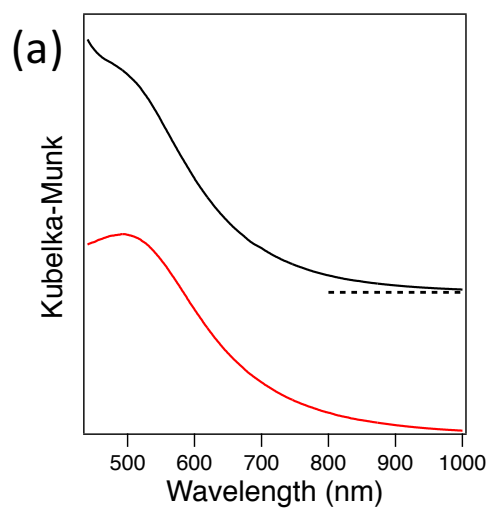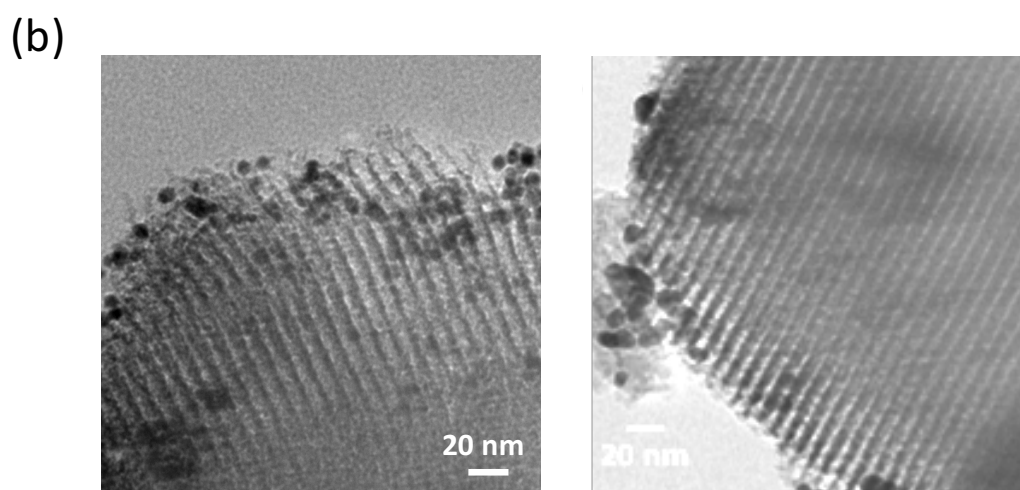

**Fig. S2.** (a) DR spectra of AuSn(6:4)/SBA-15 before (black) and after (red) the catalytic application. (b) Typical TEM images of AuSn(6:4)/SBA-15 before (left) and after (right) the catalytic application.
